# Supplementary material for: Fabrication of a 1D Mn3O4 nano-rod electrode for aqueous asymmetric supercapacitors and capacitive deionization
Source: Royal Society of Chemistry journal article supplement (doi:10.1039/c8qi00993g), 2018-10-27
Supplement: c8qi00993g1.pdf [file c8qi00993g1.pdf]

# **Fabrication of 1D $\text{Mn}_3\text{O}_4$ Nano-rods Electrode for Aqueous Asymmetric Supercapacitor and Capacitive Deionization**

Hao Zhang<sup>a,b</sup>, Dun Liu<sup>a</sup>, Yuquan Wei<sup>a,b</sup>, Aiyang Li<sup>a,b</sup>, Bo Liu<sup>a,b</sup>, Ying Yuan<sup>a,b</sup>, Haichuan

Zhang<sup>a,b</sup>, Guanghe Li<sup>a,b</sup>, Fang Zhang<sup>a,b,\*</sup>

*a School of Environment and State Key Joint Laboratory of Environment Simulation and Pollution Control,*

*Tsinghua University, Beijing 100084, China*

*b Key Laboratory for Solid Waste Management and Environment Safety (Tsinghua University), Ministry of*

*Education of China, Tsinghua University, Beijing 100084, China*

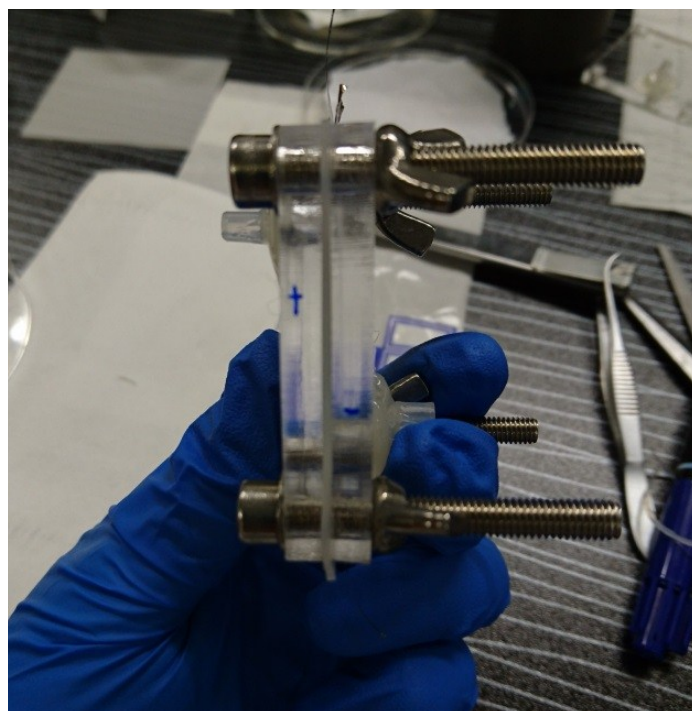

**Figure S1** Photo of CDI device.
